# Supplementary material for: The Fear of Cancer from the Standpoint of Oneself, the Opposite Sex and the Fear of Side Effects of Cancer Treatment
Source: PubMed Central journal article supplement — Cancer Res Treat. 2020 Jun 24;52(4):993–1001. doi: 10.4143/crt.2020.285 (PMC7577813; doi:10.4143/crt.2020.285), 2020-06-24
Supplement: crt-2020-285-suppl.pdf [file crt-2020-285-suppl.pdf]

7. 만약 귀하께서 암에 걸린다면, 다음 중 어떤 암이 두려움이 적을 것 같습니까?

상대적으로 두려움이 적은 암 1, 2, 3위를 각각 체크해 주십시오. ※ 1순위는 가장  
두렵지 않은 암을 의미함(아래 보기에서 선택)

| 가장 두려움이 적은 암                              |     |  |     |  |     |  |
|-------------------------------------------|-----|--|-----|--|-----|--|
| 본인                                        | 1순위 |  | 2순위 |  | 3순위 |  |
| 남성인 경우는<br>여성을, 여성인<br>경우는 남성을<br>가정하여 선택 | 1순위 |  | 2순위 |  | 3순위 |  |

| 보기                                                                                                                                                  |                   |       |           |        |        |  |
|-----------------------------------------------------------------------------------------------------------------------------------------------------|-------------------|-------|-----------|--------|--------|--|
| ① 위암                                                                                                                                                | ② 대장암             | ③ 폐암  | ④ 간암      | ⑤ 갑상선암 | ⑥ 전립선암 |  |
| ⑦ 방광암                                                                                                                                               | ⑧ 신장암             | ⑨ 췌장암 | ⑩ 담도/담낭암* | ⑪ 백혈병  | ⑫ 유방암  |  |
| ⑬ 자궁경부암*                                                                                                                                            | ⑭ 자궁암* (자궁경부암 제외) |       | ⑮ 난소암     |        |        |  |
| <p>※ 참고</p> <p>담도암 : 담즙이 흘러 들어가는 경로에 발생하는 암</p> <p>담낭암 : 담낭(쓸개)에 발생하는 암</p> <p>자궁경부암 : 자궁경부(자궁입구)에 발생하는 암</p> <p>자궁암 : 자궁에서 자궁경부가 아닌 부위에 발생하는 암</p> |                   |       |           |        |        |  |

8. 만약 귀하께서 암에 걸린다면, 다음 중 어떤 암이 두려움이 클 것 같습니까?

상대적으로 두려움이 큰 암 1, 2, 3위를 각각 체크해 주십시오.

남성/여성인 경우를 모두 가정하여 선택해주십시오. ※ 1순위는 가장 두려운 암을  
의미함(위의 보기에서 선택)

| 가장 두려움이 큰 암                               |     |  |     |  |     |  |
|-------------------------------------------|-----|--|-----|--|-----|--|
| 본인                                        | 1순위 |  | 2순위 |  | 3순위 |  |
| 남성인 경우는<br>여성을, 여성인<br>경우는 남성을<br>가정하여 선택 | 1순위 |  | 2순위 |  | 3순위 |  |

9. 암 치료와 관련한 후유증 중에서 가장 두려운 것은 무엇입니까? 가장 두려운 후유증 1, 2, 3위를 각각 체크해 주십시오. ※ 1순위는 가장 두려운 후유증을 의미함

| 1순위 |  | 2순위 |  | 3순위 |  |
|-----|--|-----|--|-----|--|
|-----|--|-----|--|-----|--|

- ① 통증
- ② 피로
- ③ 전신 쇠약감
- ④ 소화기 장애(구토, 설사 등)
- ⑤ 성기능 장애
- ⑥ 정신적 측면(우울, 불안 등)
- ⑦ 비뇨기 장애(요실금, 변실금 등)
- ⑧ 운동기능 장애
- ⑨ 감각 장애
- ⑩ 외형의 변화(탈모 등)
- ⑪ 림프부종
- ⑫ 불임
- ⑬ 기타
